# Supplementary material for: MIL-88A@polyoxometalate microrods as an advanced anode for high-performance lithium ion batteries
Source: Royal Society of Chemistry journal article supplement (doi:10.1039/d0ce00197j), 2020-01-01
Supplement: d0ce00197j1.pdf [file d0ce00197j1.pdf]

## Supporting Information

### **Polyoxometalates@MIL-88A microrods as an advanced anode for high-performance lithium ion batteries**

*Xiangchen Zhao,<sup>†,‡</sup> Guiling Niu,<sup>†,‡</sup> Hongxun Yang,<sup>\*, †,‡,§</sup> Jiaojiao Ma,<sup>†,§</sup> Mengfei Sun,<sup>†,§</sup> Minghang Xu,<sup>†</sup> Weiwei Xiong,<sup>†</sup> Tongyi Yang,<sup>†</sup> Lizhuang Chen,<sup>†</sup> and Changhua Wang<sup>§</sup>*

*<sup>†</sup>School of Environmental & Chemical Engineering and <sup>‡</sup>Marine Equipment and Technology Institute, Jiangsu University of Science and Technology, Zhenjiang 212003, Jiangsu, China,*

*<sup>§</sup>Yunfan (Zhenjiang) New Energy Materials, Co. Ltd. Zhenjiang 212050, Jiangsu, China,*

*<sup>§</sup>Zhenjiang Dongya Carbon Coke, Co. Ltd. Zhenjiang 212008, Jiangsu, China,*

\*Corresponding author: E-mail address: [yhongxun@126.com](mailto:yhongxun@126.com) (Hongxun Yang)

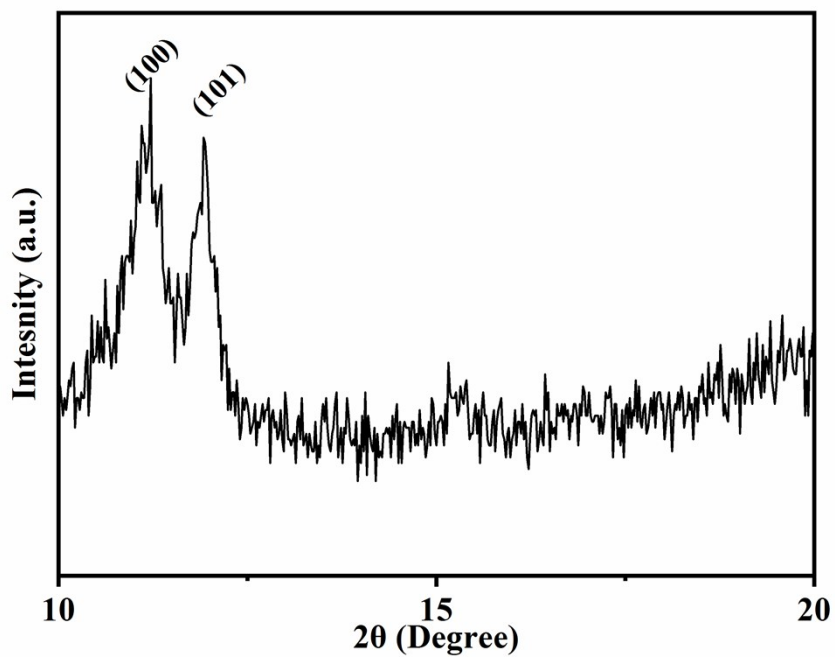

Figure S1. XRD of MIL-88A@PMo<sub>12</sub> at 2θ=10~20°

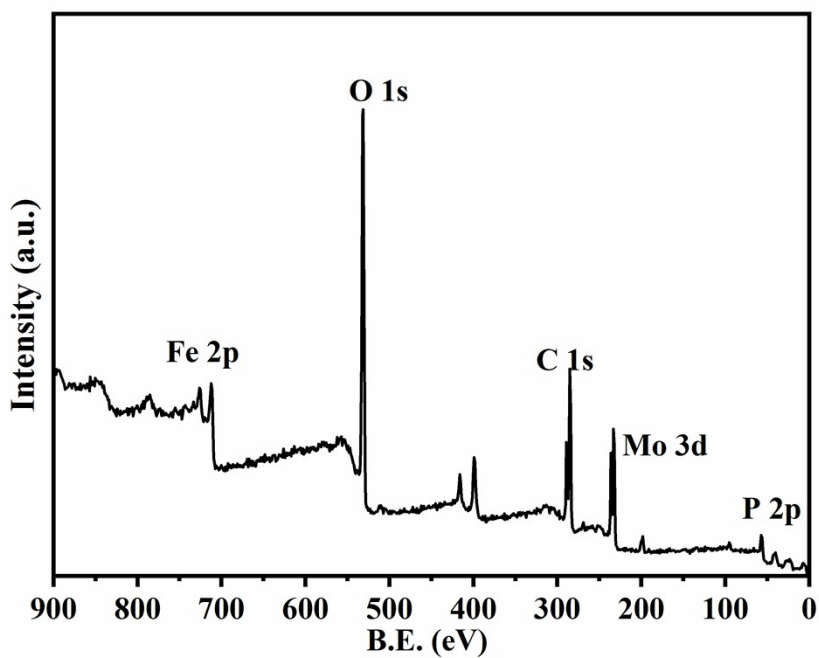

Figure S2. XPS survey spectrum of MIL-88A@PMo<sub>12</sub>.

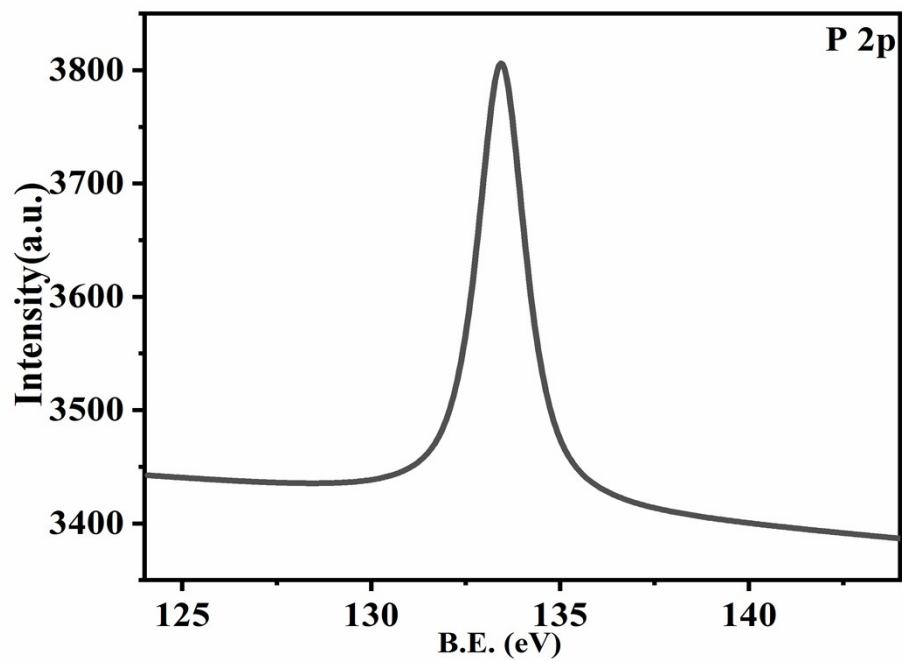

Figure S3. XPS of P2p in MIL-88A@PMo<sub>12</sub>.

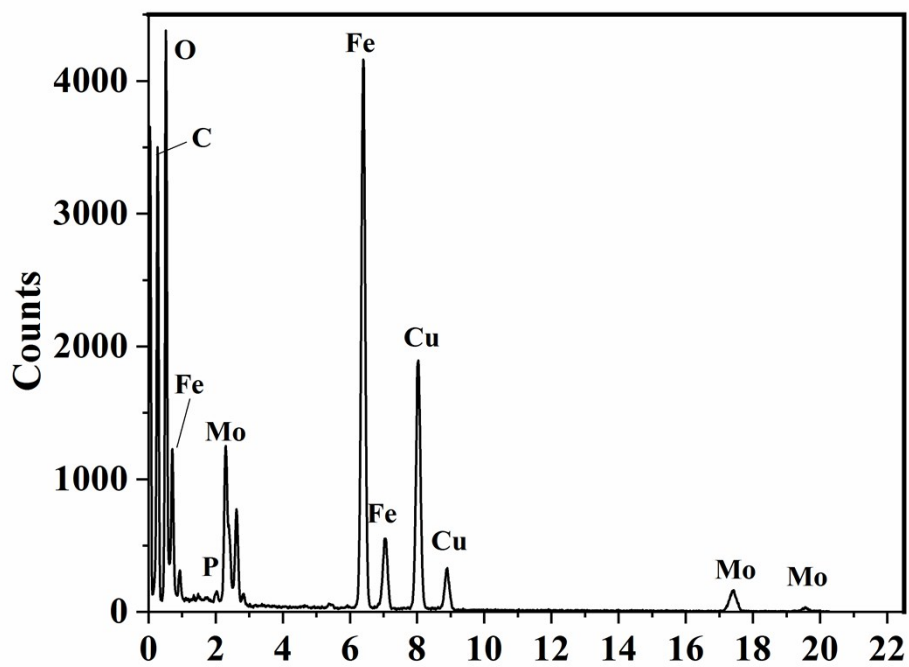

Figure S4. EDS of the MIL-88A@PMo<sub>12</sub>.

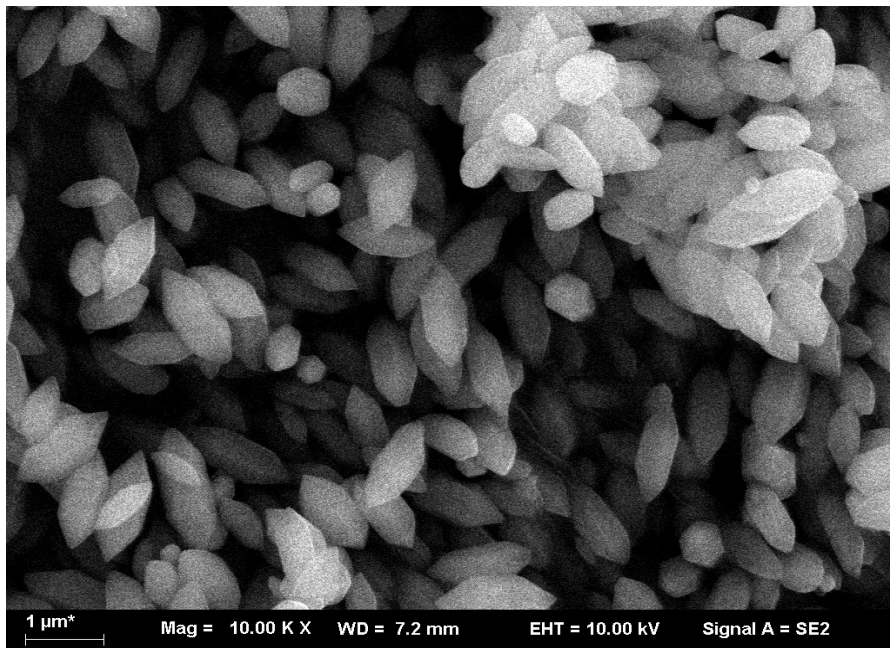

Figure S5. the SEM images of MIL-88A.

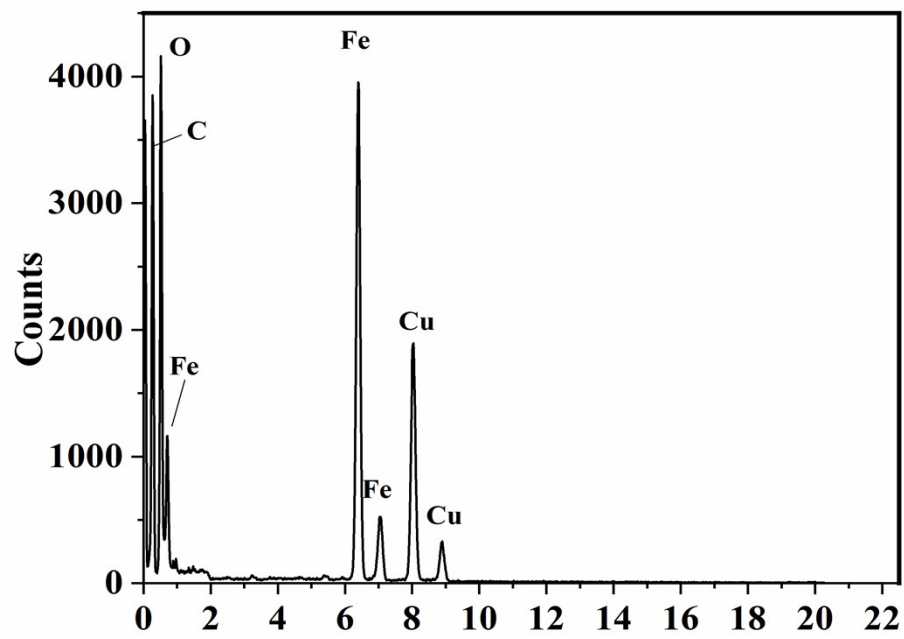

Figure S6. EDS of the MIL-88A.

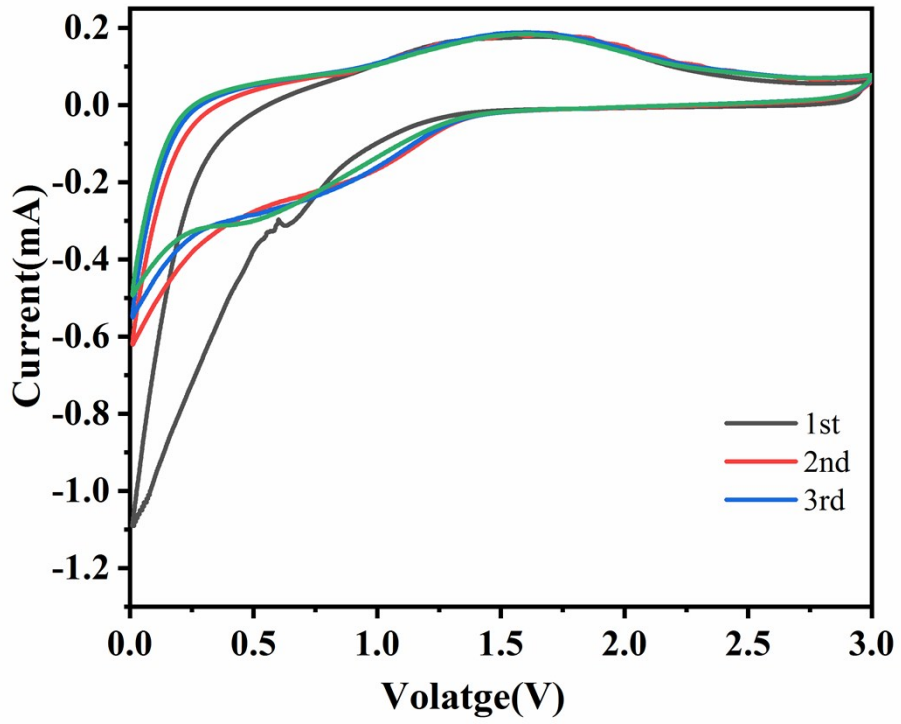

Figure S7. the CV curves of MIL-88A.
